# Supplementary material for: Enhanced thermoelectric performance, inter-layer coupling effects and reduced lattice thermal conductivity in two-dimensional transition metal oxides
Source: Royal Society of Chemistry journal article supplement (doi:10.1039/d5na00303b), 2025-01-01
Supplement: d5na00303b1.pdf [file d5na00303b1.pdf]

## SUPPLEMENTARY MATERIAL

### **Enhanced Thermoelectric Performance, Inter-Layer Coupling Effects and Reduced Lattice Thermal Conductivity in Transition Metal Oxide Two-Dimensional Compounds:**

Aadil Fayaz Wani<sup>1</sup>, Kulwinder Kaur<sup>2\*</sup>, Baljinder Kaur<sup>3</sup>, Sikander Iqbal<sup>4</sup>, Shobhna Dhiman<sup>1</sup>  
Shakeel Ahmad Khandy<sup>5#</sup>

<sup>1</sup>Department of Physics, Punjab Engineering College (Deemed to be University), Chandigarh, India

<sup>2</sup>Mehr Chand Mahajan, DAV college for women, Chandigarh, India

<sup>3</sup>Institute of Nano Science and Technology, Sahibzada Ajit Singh Nagar, Punjab-140306, India

<sup>4</sup>ZJU-Hangzhou Global Scientific and Technological Innovation Center, Zhejiang University  
311200-China

<sup>5</sup>Frontier Research Institute for Interdisciplinary Sciences, Islamic University of Science & Technology, Awantipora, 192122-India

Email: \* [kulwinderphysics@gmail.com](mailto:kulwinderphysics@gmail.com) ;# [shakeelkhandy11@gmail.com](mailto:shakeelkhandy11@gmail.com)

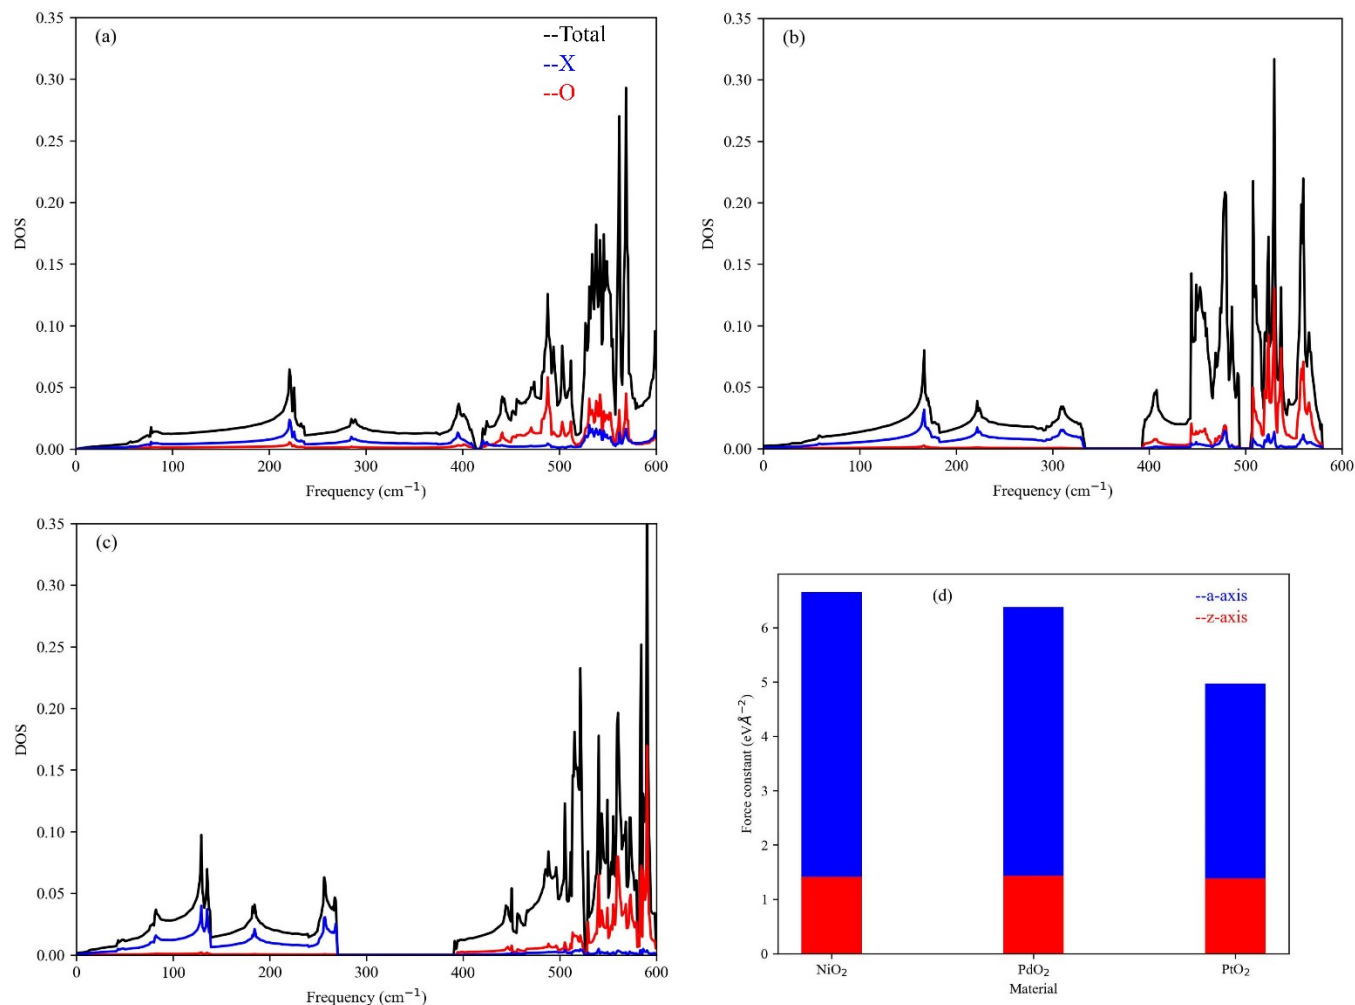

**Figure S1.** Atom-projected phonon density of states (PDOS) for (a)  $\text{NiO}_2$  (b)  $\text{PdO}_2$ , (c)  $\text{PtO}_2$  bilayers, respectively. (d) Harmonic force constants for the nearest-neighbor atom pairs for  $\text{XO}_2$  bilayers along a and z-directions.

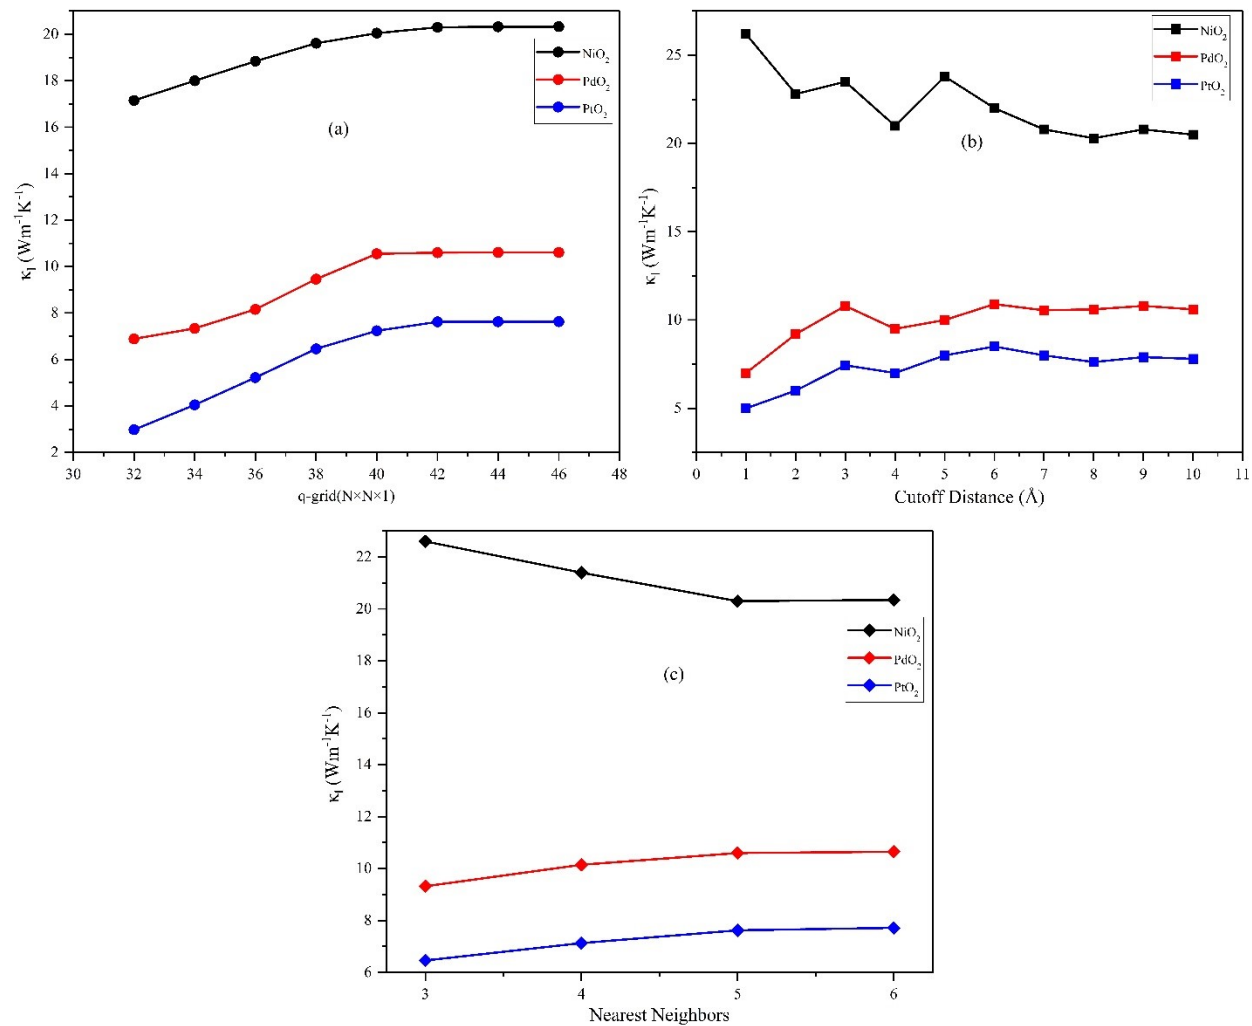

**Figure S2.** Convergence of lattice thermal conductivity with respect to (a) q-grid, (b) cutoff distance and (c) nearest neighbors of  $\text{XO}_2$  ( $\text{X}=\text{Ni}, \text{Pd}, \text{Pt}$ ) bilayers.

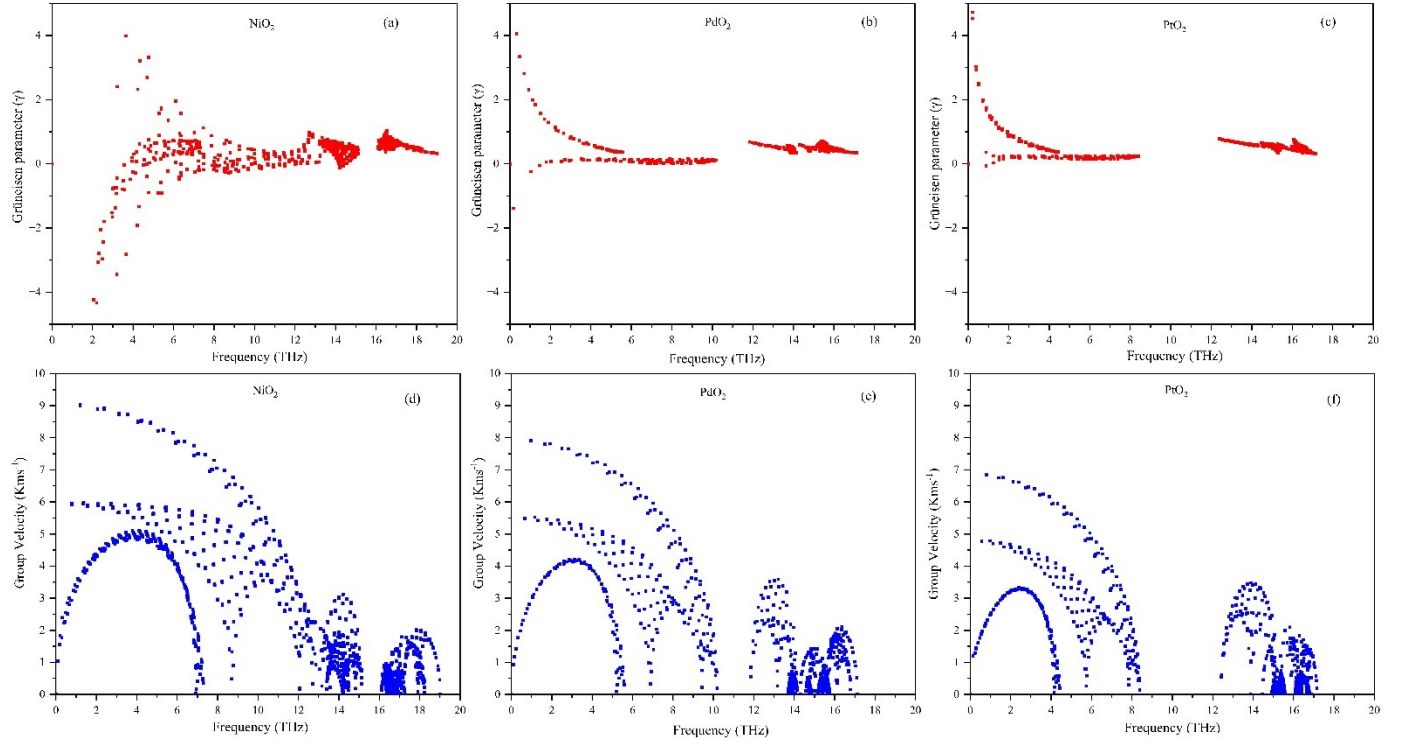

**Figure S3.** Grüneisen parameter (a, b, c) and group velocity (d, e, f) of  $\text{NiO}_2$ ,  $\text{PdO}_2$  and  $\text{PtO}_2$  monolayers, respectively, with respect to frequency at room temperature.

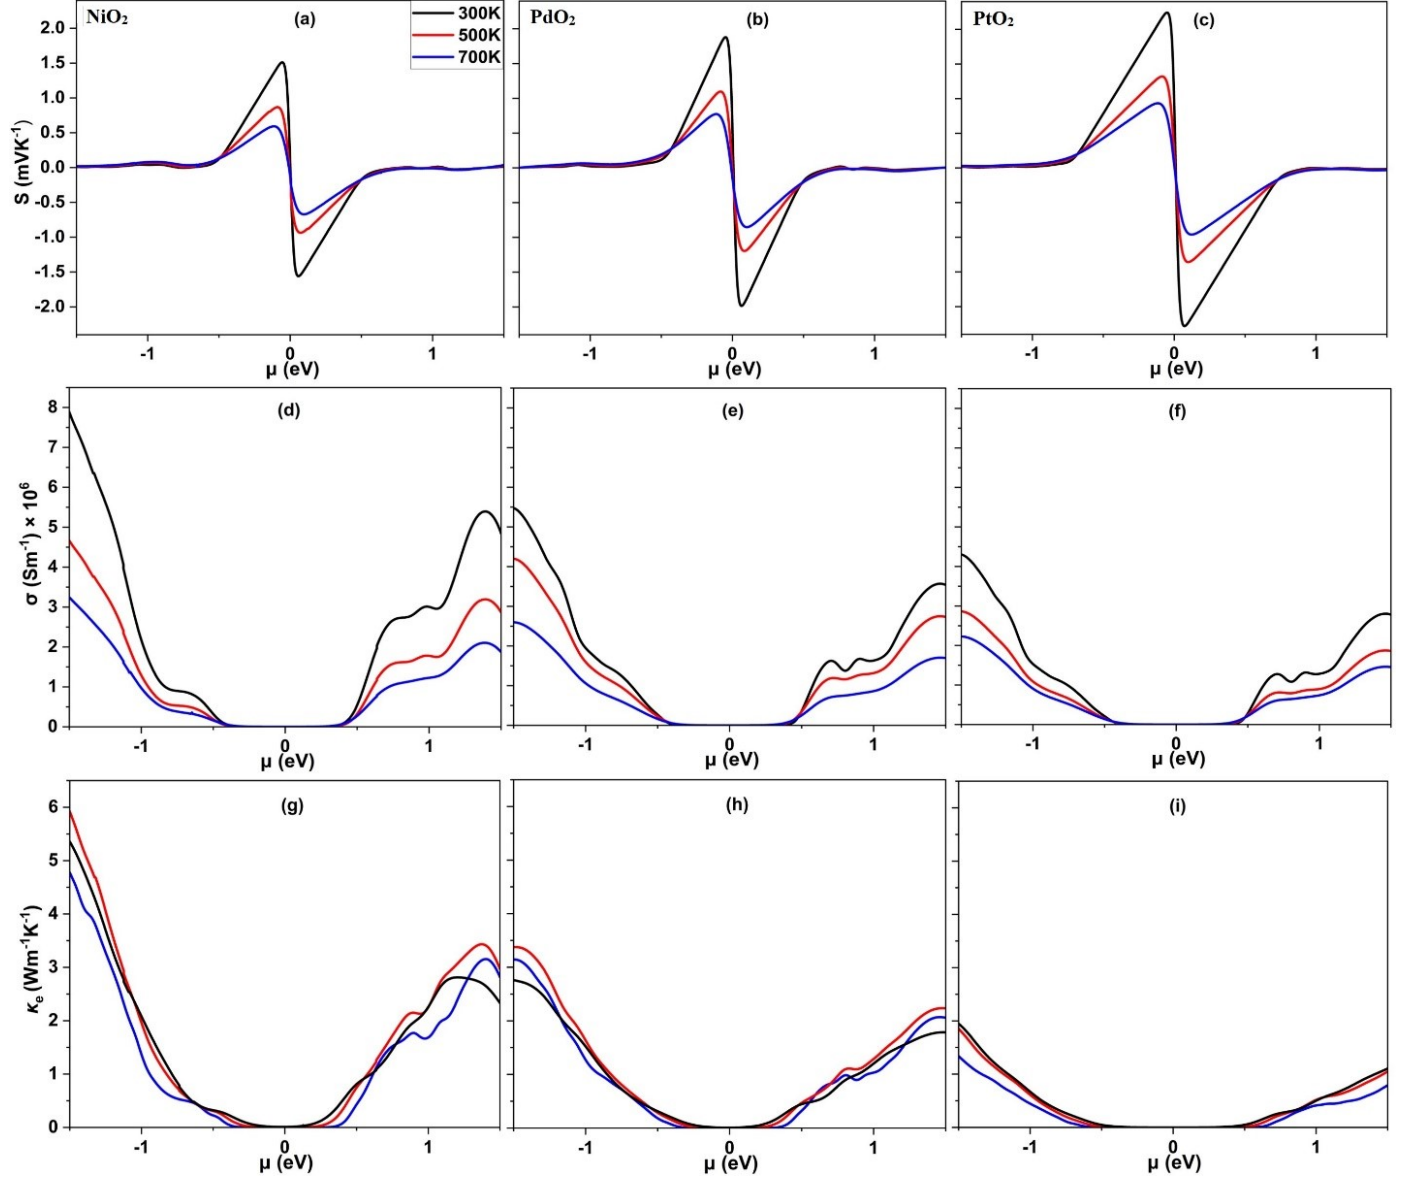

**Figure S4.** Electronic transport parameters of NiO<sub>2</sub> (left panel), PdO<sub>2</sub> (middle panel) and PtO<sub>2</sub> (right panel) bilayer plotted against chemical potential at various temperatures (300, 500 and 700 K). Seebeck coefficient ( $S$ ) is shown in a, b, c, electrical conductivity ( $\sigma$ ) by d, e, f and electronic thermal conductivity ( $\kappa_e$ ) by g, h, i.

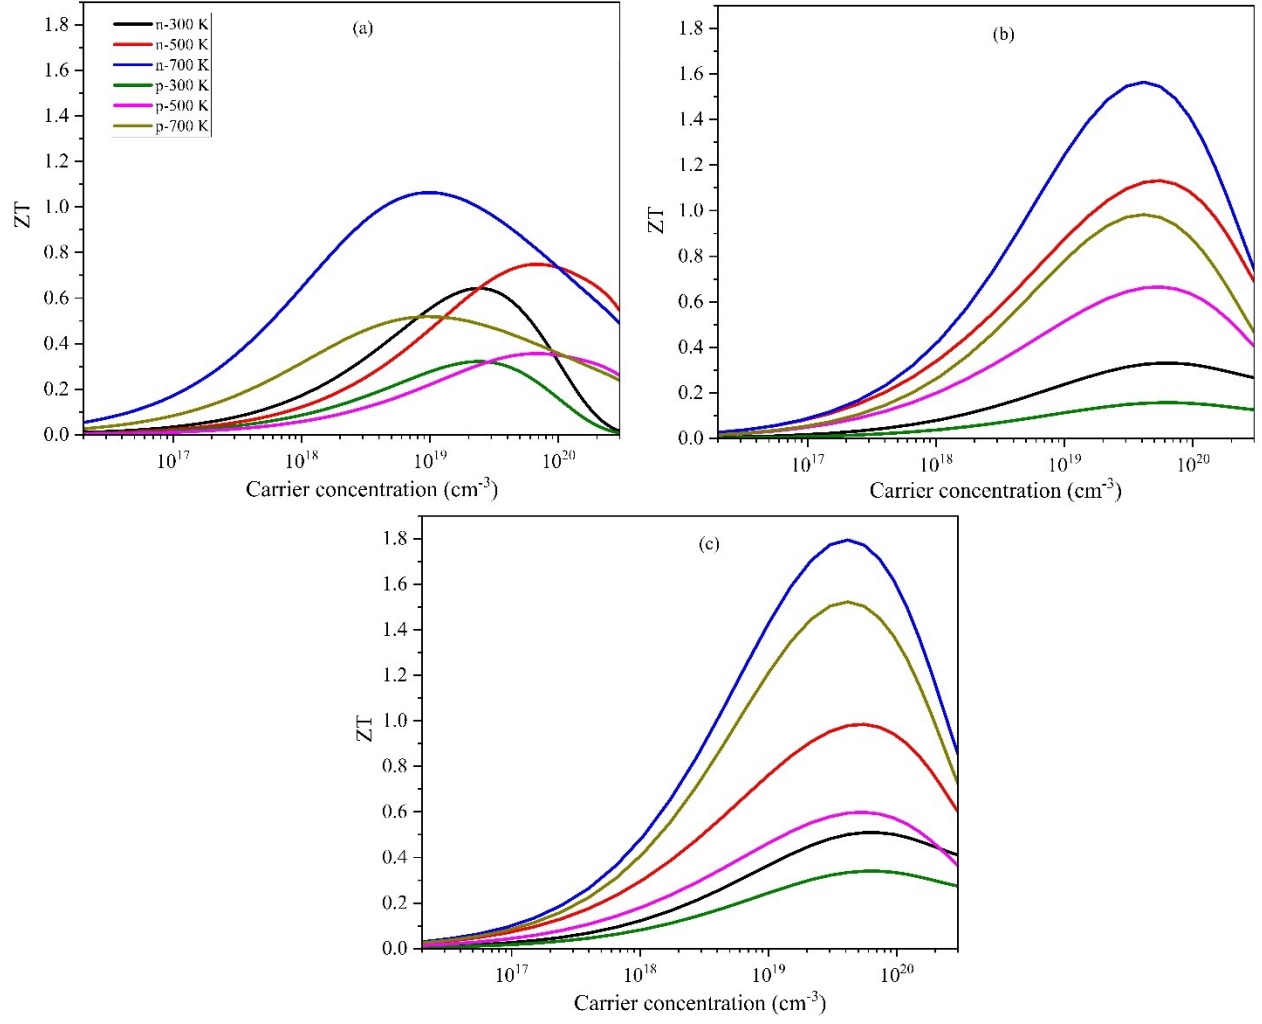

**Figure S5.** Figure of merit (ZT) as a function of chemical potential at various temperatures. of (a) NiO<sub>2</sub>, (b) PdO<sub>2</sub>, (c) PtO<sub>2</sub> bilayers.
